# Frequent Promoter Hypermethylation of the *APC* and *RASSF1A* Tumour Suppressors in Parathyroid Tumours

C. Christofer Juhlin<sup>1,2\*</sup>, Nimrod B. Kiss<sup>1</sup>, Andrea Villablanca<sup>1</sup>, Felix Haglund<sup>1</sup>, Jörgen Nordenström<sup>1</sup>, Anders Höög<sup>2</sup>, Catharina Larsson<sup>1</sup>

<sup>1</sup> Department of Molecular Medicine and Surgery, Center for Molecular Medicine, Karolinska Institutet, Karolinska University Hospital Solna, Stockholm, Sweden,

<sup>2</sup> Department of Oncology-Pathology, Center for Molecular Medicine, Karolinska Institutet, Karolinska University Hospital Solna, Stockholm, Sweden

## Abstract

**Background:** Parathyroid adenomas constitute the most common entity in primary hyperparathyroidism, and although recent advances have been made regarding the underlying genetic cause of these lesions, very little data on epigenetic alterations in this tumour type exists. In this study, we have determined the levels of promoter methylation regarding the four tumour suppressor genes *APC*, *RASSF1A*, *p16<sup>INK4A</sup>* and *RAR-β* in parathyroid adenomas. In addition, the levels of global methylation were assessed by analyzing *LINE-1* repeats.

**Methodology/Principal Findings:** The sample collection consisted of 55 parathyroid tumours with known *HRPT2* and/or *MEN1* genotypes. Using Pyrosequencing analysis, we demonstrate *APC* promoter 1A and *RASSF1A* promoter hypermethylation in the majority of parathyroid tumours (71% and 98%, respectively). Using TaqMan qRT-PCR, all tumours analyzed displayed lower *RASSF1A* mRNA expression and higher levels of total *APC* mRNA than normal parathyroid, the latter of which was largely conferred by augmented *APC 1B* transcription levels. Hypermethylation of *p16<sup>INK4A</sup>* was demonstrated in a single adenoma, whereas *RAR-β* hypermethylation was not observed in any sample. Moreover, based on *LINE-1* analyses, parathyroid tumours exhibited global methylation levels within the range of non-neoplastic parathyroid tissues.

**Conclusions/Significance:** The results demonstrate that *APC* and *RASSF1A* promoter hypermethylation are common events in parathyroid tumours. While *RASSF1A* mRNA levels were found downregulated in all tumours investigated, *APC* gene expression was retained through *APC 1B* mRNA levels. These findings suggest the involvement of the Ras signaling pathway in parathyroid tumorigenesis. Additionally, in contrast to most other human cancers, parathyroid tumours were not characterized by global hypomethylation, as parathyroid tumours exhibited *LINE-1* methylation levels similar to that of normal parathyroid tissues.

**Citation:** Juhlin CC, Kiss NB, Villablanca A, Haglund F, Nordenström J, et al. (2010) Frequent Promoter Hypermethylation of the *APC* and *RASSF1A* Tumour Suppressors in Parathyroid Tumours. PLoS ONE 5(3): e9472. doi:10.1371/journal.pone.0009472

**Editor:** Chun-Ming Wong, University of Hong Kong, Hong Kong

**Received:** September 23, 2009; **Accepted:** February 9, 2010; **Published:** March 1, 2010

**Copyright:** © 2010 Juhlin et al. This is an open-access article distributed under the terms of the Creative Commons Attribution License, which permits unrestricted use, distribution, and reproduction in any medium, provided the original author and source are credited.

**Funding:** The study was financially supported by the Swedish Cancer Foundation, the Cancer Society in Stockholm, the Gustav V. Jubilee Foundation, the Göran Gustavsson Foundation for Research in Natural Sciences and Medicine, the Swedish Research Council, the Stockholm County Council, and the Karolinska Institutet. The funders had no role in study design, data collection and analysis, decision to publish, or preparation of the manuscript.

**Competing Interests:** The authors have declared that no competing interests exist.

\* E-mail: christofer.juhlin@ki.se

## Introduction

Primary hyperparathyroidism (PHPT) is a common endocrine disorder which denotes the tumorous enlargement of one or more of the parathyroid glands. While the genetic background of PHPT has been partly elucidated, the involvement of epigenetic modifications remains unresolved. Mutations in the *HRPT2* (also known as *CDC73*) and *MEN1* tumour suppressor genes are two important genetic events propelling parathyroid tumorigenesis [1–3]. The protein product of *HRPT2* is parafibromin, which is functionally linked to the canonical part of the Wingless type (Wnt) pathway [4]. Parafibromin is a part of the human polymerase associated factor complex (hPAF) which is required for facilitating transcription elongation and histone modifications [5–6]. Furthermore, parafibromin has been shown to associate with the Wnt oncoprotein β-catenin and to down-regulate c-Myc oncogene transcription through direct binding to the c-Myc promoter

region, supporting the role of parafibromin as a tumor suppressor protein that inhibits Wnt signaling [7]. Interestingly, the *MEN1* product menin was also coupled to the Wnt pathway, demonstrated by its epigenetic regulation of *Axin2* and by expression profiling of *MEN1* knock-out mice [8–9].

To broaden the knowledge of epigenetic events in parathyroid tumour development, we sought to determine the levels of promoter methylation of four tumour suppressor genes; *APC* (adenomatous polyposis coli), *p16<sup>INK4A</sup>*, *RASSF1A* (Ras association domain family protein 1) and *RAR-β* (Retinoic acid receptor-beta), all known to be widely hypermethylated in various human cancers as well as exhibiting potential as parathyroid tumour suppressor genes. *APC* mutations are responsible for the autosomal dominant familial adenomatous polyposis (FAP) syndrome [10–11], and are also found in sporadic colorectal cancer as well as in other tumour types, such as cancer of the thyroid and mammary glands [12–13]. Hypermethylation of the *APC* promoter 1A has been demonstrat-

ed in e.g. cancer of the colorectum, breast and lung [14–15]. Furthermore, loss of APC immunoreactivity has recently been implicated in parathyroid malignant tumours [16]. The tumour suppressor protein p16<sup>ink4A</sup> regulates the G<sub>1</sub> to S phase transition of the cell cycle through its inhibition of the interaction between Cdk 4/6 and cyclin D1. Parathyroid tumours often demonstrate over-expression of cyclin D1, thus making the p16<sup>ink4A</sup> gene an interesting candidate for promoter methylation assays since p16<sup>ink4A</sup> inactivation might produce parallel oncogenic effects analogous to cyclin D1 up-regulation [17]. p16<sup>ink4A</sup> gene mutations have been sought in parathyroid tumours due to the presence of 9p21-pter deletions in small subsets of parathyroid adenomas; however, no mutations have been demonstrated [18].

The *RASSF1A* gene localized to 3p21 is epigenetically inactivated with high regularity in human cancers as well as in endocrine tumours such as pheochromocytomas and follicular thyroid cancer [19–21]. Interestingly, *RASSF1A* has been shown to down-regulate cyclin D1 expression in addition to its role as a Ras-binding protein, hypothetically making the *RASSF1A* gene a potential candidate as a parathyroid tumour suppressor gene [22]. *RAR-β* is a member of the nuclear receptor superfamily with the main function to convey retinoid signaling into target gene transcription in the nucleus. The *RAR-β* promoter exhibit frequent hypermethylation in various tumours, as for instance in breast- and prostate cancer as well as in malignant mesothelioma [23–25]. Recently, it was shown that up-regulation of the oncogene *c-myc* increased the levels of *RAR-β* promoter methylation in a prostate cell line, suggesting that these events might be directly or indirectly coupled [26]. These findings are of particular interest as *c-myc* over-expression has been demonstrated in parathyroid tumours [27].

In addition to gene-specific hypermethylation, global hypomethylation is a common characteristic in human cancers [28–29]. *LINE-1* (long interspersed nuclear elements-1) retrotransposons denote replicating repetitive elements which constitute about 15% of the human genome. CpG sites within the *LINE-1* promoter region are normally heavily methylated to protect from retrotransposon activation, and *LINE-1* hypomethylation is a noted epigenetic event in human tumorigenesis. For example, *LINE-1* promoter hypomethylation is common in colon cancer, and the retrotransposal insertion of a *LINE-1* sequence has been directly shown to disrupt the *APC* gene in a case of colon cancer [29–30]. Furthermore, quantifying *LINE-1* promoter methylation densities have been shown to be a reliable substitute for global methylation assays [31].

Towards these ends, we have quantified promoter methylation of *APC*, *RASSF1A*, p16<sup>ink4A</sup>, *RAR-β* and *LINE-1* repeats in a series of parathyroid tumours characterized for *HRPT2* and *MEN1* genotypes.

## Results

### The APC and RASSF1A Promoters Are Hypermethylated in Parathyroid Tumours

In total, 55 parathyroid tumours were assessed for *APC*, *RASSF1A*, p16<sup>ink4A</sup> and *RAR-β* regional promoter methylation using Pyrosequencing analysis. Examples of Pyrograms are illustrated in Figure 1 and the results are summarized in Table 1. The density of promoter methylation in each tumour was calculated as a mean for the individual CpG residues, and the results are also presented as the range from minimum to maximum methylation density for the individual sites assessed (Table 1). The results indicate that CpG-specific methylation in parathyroid tumours is a common event at the *APC* and *RASSF1A*

promoters but rarely occur at the p16<sup>ink4A</sup> and *RAR-β* promoter loci (Figure 2). For *APC*, the mean CpG methylation ranged from 1.5% (case RAD1) to 77.5% (case H2) in our panel (Table 1). Normal parathyroid tissues (Normal PT 1–3) displayed very low levels of *APC* promoter methylation (2.2%, 4.0% and 3.3%; Table 1). In addition, SHPT1, thymus tissue from case H1 as well as leukocyte DNA from patient RAD2 also exhibited low *APC* methylation (2.3% and 2.5%), in agreement with previous report of low *APC* methylation density in other non-neoplastic tissues such as colonic mucosa (≤5%) [32]. In our study, a total of 39 out of 55 tumours (71%) were considered to exhibit a hypermethylated *APC* promoter 1A (above 10% density) as compared to the 16 tumours (29%) with very low methylation (below 10% density). Twenty-four out of the 34 cystic parathyroid adenomas (71%) exhibited hypermethylation, as well as 14 out of 19 (74%) of the regular parathyroid adenomas. For the two cases with germ-line *HRPT2* gene mutations (H1-2), the atypical adenoma case H1 presented with virtually no methylation (2.3%), whereas the parathyroid adenoma H2 was endowed with the highest density of *APC* methylation in the entire series (77.5%).

For *RASSF1A*, the methylation ranged from 8% (CAD13) to 80% (RAD4) and 54 out of 55 (98%) tumours displayed methylation densities above 10% (Table 1, Figure 2). The three normal parathyroid samples presented with almost no *RASSF1A* promoter methylation and additional non-tumorous controls consisting of normal thymus and leukocyte DNA also displayed low levels of *RASSF1A* methylation. Case SHPT1 however exhibited an average methylation density of 30.2% (Table 1, Figure 2). There was a significant but weak positive correlation between *APC* and *RASSF1A* methylation levels, suggesting that tumours with high levels of *APC* methylation density frequently demonstrate high *RASSF1A* methylation levels (Pearson's correlation 0.301, p = 0.022, Table 2).

Regarding p16<sup>ink4A</sup> promoter methylation, one case was found to be hypermethylated as compared to non-tumorous controls (RAD2, 14.9%). The remaining 54 cases (98%) displayed very low mean levels of promoter methylation densities (<10%) (Table 1). However, nine of these cases were found to exhibit methylation levels above 10% at one or more individual CpG sites, with preferential involvement of CpG site 7. For *RAR-β*, all tumours and normal controls displayed low levels of promoter methylation (<10%) (Table 1).

### Assessment of Global Methylation in Parathyroid Tumours

Regarding *LINE-1* promoter methylation, normal parathyroid tissues ranged from 59.7% to 72.3%, thereby encompassing the vast majority (45/55; 82%) of all parathyroid tumours investigated.

### Comparison of Promoter Methylation Density with Clinical and Genetic Parameters

Possible correlations were evaluated between methylation density of the individual hypermethylated *APC* and *RASSF1A* promoters with clinical and genetic characteristics (Table 1, Table 2, Table 3 and Table S1). No significant correlations were observed between *APC* promoter hypermethylation and serum levels of calcium, PTH or glandular weight (Table 2). For *RASSF1A*, no correlation between methylation levels and serum calcium, PTH or glandular weight was demonstrated; however, increased levels of *RASSF1A* methylation correlated negatively with serum calcium (Table 2).

All *MEN1* mutated tumours in the current study displayed *APC* promoter 1A hypermethylation, and a weak but significant

## APC – case RAD 13

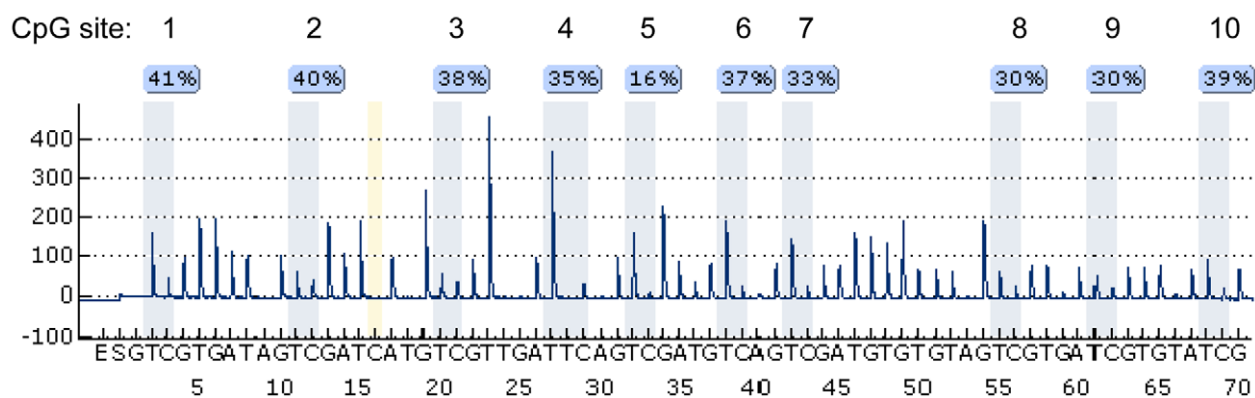

## RASSF1A – case RAD 13

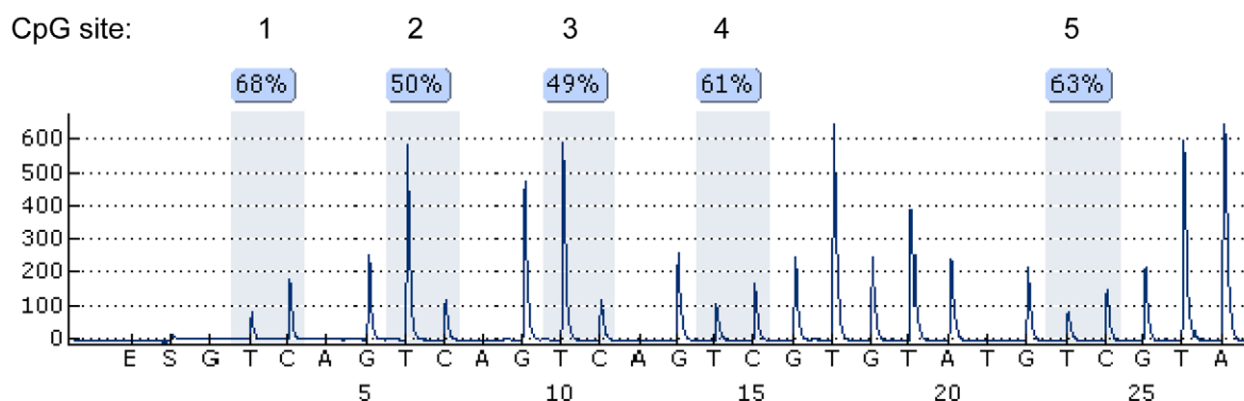*p16<sup>INK4A</sup>* – case RAD 13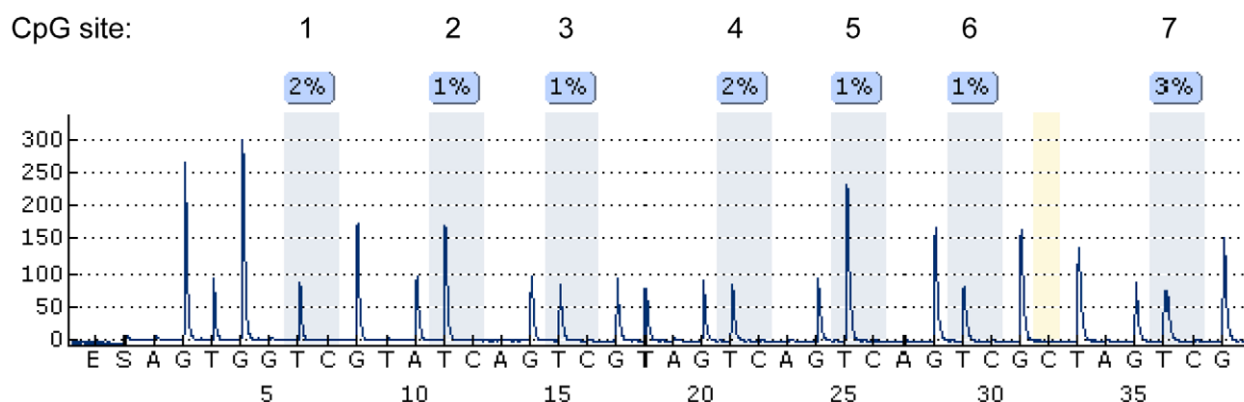

**Figure 1. Examples of Pyrograms for quantification of methylation densities.** 10 CpG sites of the APC promoter 1A, 5 CpG sites of the RASSF1A promoter and 7 CpG sites of the *p16<sup>INK4A</sup>* promoter are shown for case RAD 13, a tumour carrying a somatic *MEN1* mutation. The tumour displays methylation densities of 33.9% at APC (range 16–41%), 58.2% at RASSF1A (range 49–68%) and 1.6% at *p16<sup>INK4A</sup>* (range 1–3%), respectively. Nucleotides at position #16 of the APC promoter region 1A and at position #32 of the *p16<sup>INK4A</sup>* promoter (yellow) are examples of CpG free cytosine residues which serve as internal controls for satisfactory bisulphite-driven C to T conversion for each DNA sample.  
doi:10.1371/journal.pone.0009472.g001

**Table 1.** Results from the gene promoter methylation analyses in parathyroid tumours and control tissues.

| Case no.              | APC methylation † |           | RASSF1A methylation † |           | p16 <sup>INK4A</sup> methylation † |           | RAR-β methylation † |           | LINE-1 methylation † |           | Genotypes* |         |
|-----------------------|-------------------|-----------|-----------------------|-----------|------------------------------------|-----------|---------------------|-----------|----------------------|-----------|------------|---------|
|                       | mean %            | (range) % | mean %                | (range) % | mean %                             | (range) % | mean %              | (range) % | mean %               | (range) % | MEN1       | HRPT2   |
| <i>Tumour samples</i> |                   |           |                       |           |                                    |           |                     |           |                      |           |            |         |
| CAD1                  | 2.7               | (2–5)     | 39.6                  | (24–55)   | 8.1                                | (2–27)    | 1.0                 | (1–1)     | 66.3                 | (64–69)   | wt         | wt      |
| CAD2                  | 2.7               | (2–4)     | 45.2                  | (34–59)   | 1.3                                | (1–2)     | 0.9                 | (0–2)     | 67.3                 | (66–70)   | wt         | wt      |
| CAD3                  | 2.9               | (2–4)     | 46.8                  | (28–64)   | 2.1                                | (1–5)     | 1.1                 | (1–2)     | 67.0                 | (65–69)   | wt         | wt      |
| CAD4                  | 3.4               | (2–4)     | 37.2                  | (22–48)   | 2.9                                | (1–5)     | 0.9                 | (0–1)     | 68.3                 | (65–71)   | wt         | wt      |
| CAD5                  | 3.6               | (2–6)     | 50.0                  | (35–71)   | 4.4                                | (2–14)    | 1.0                 | (0–2)     | 67.7                 | (64–70)   | wt         | wt      |
| CAD6                  | 3.8               | (3–5)     | 40.6                  | (27–57)   | 1.4                                | (1–2)     | 1.9                 | (1–3)     | 72.3                 | (70–75)   | wt         | wt      |
| CAD7                  | 3.9               | (3–5)     | 49.0                  | (30–69)   | 1.9                                | (1–3)     | 1.7                 | (0–4)     | 64.7                 | (62–67)   | wt         | wt      |
| CAD8                  | 4.0               | (3–5)     | 55.4                  | (41–71)   | 1.1                                | (1–2)     | 1.1                 | (1–2)     | 64.7                 | (62–66)   | wt         | wt      |
| CAD9                  | 5.3               | (4–6)     | 38.0                  | (23–50)   | 0.9                                | (0–1)     | 0.8                 | (0–1)     | 64.0                 | (60–66)   | wt         | wt      |
| CAD10                 | 9.1               | (6–13)    | 19.2                  | (9–31)    | 1.3                                | (1–2)     | 1.4                 | (0–3)     | 65.0                 | (64–67)   | wt         | wt      |
| CAD11                 | 10.3              | (5–13)    | 48.8                  | (25–70)   | 1.6                                | (1–3)     | 1.6                 | (1–3)     | 71.3                 | (69–73)   | wt         | Mut (S) |
| CAD12                 | 10.8              | (7–26)    | 59.4                  | (48–67)   | 1.3                                | (1–2)     | 2.1                 | (1–4)     | 63.7                 | (61–66)   | wt         | wt      |
| CAD13                 | 15.8              | (11–19)   | 8.0                   | (7–11)    | 5.4                                | (2–14)    | 0.4                 | (0–2)     | 72.7                 | (71–75)   | wt         | wt      |
| CAD14                 | 19.5              | (12–26)   | 46.6                  | (32–59)   | 1.4                                | (1–2)     | 4.0                 | (2–8)     | 72.7                 | (70–77)   | wt         | wt      |
| CAD15                 | 23.4              | (15–30)   | 52.8                  | (38–67)   | 2.6                                | (2–3)     | 1.4                 | (1–2)     | 68.0                 | (66–72)   | wt         | wt      |
| CAD16                 | 26.8              | (8–38)    | 60.4                  | (49–73)   | 1.6                                | (1–3)     | 5.3                 | (3–7)     | 66.7                 | (63–69)   | wt         | wt      |
| CAD17                 | 26.9              | (9–36)    | 39.6                  | (15–77)   | 2.7                                | (2–3)     | 1.3                 | (1–2)     | 65.3                 | (64–66)   | wt         | wt      |
| CAD18                 | 28.7              | (11–37)   | 57.4                  | (47–67)   | 0.9                                | (0–2)     | 0.6                 | (0–3)     | 62.3                 | (60–64)   | wt         | wt      |
| CAD19                 | 30.0              | (11–38)   | 50.2                  | (36–71)   | 1.0                                | (1–1)     | 1.0                 | (0–2)     | 70.7                 | (69–74)   | wt         | wt      |
| CAD20                 | 30.9              | (16–36)   | 58.2                  | (30–86)   | 2.3                                | (1–4)     | 1.0                 | (1–1)     | 64.3                 | (61–67)   | wt         | wt      |
| CAD21                 | 31.0              | (18–38)   | 24.2                  | (14–37)   | 3.9                                | (2–7)     | 1.9                 | (1–2)     | 73.3                 | (71–75)   | wt         | wt      |
| CAD22                 | 32.5              | (16–42)   | 49.6                  | (36–59)   | 1.3                                | (1–2)     | 1.3                 | (1–2)     | 66.0                 | (64–68)   | wt         | wt      |
| CAD23                 | 32.8              | (20–38)   | 49.8                  | (29–61)   | 2.4                                | (1–5)     | 2.9                 | (2–5)     | 66.7                 | (64–68)   | wt         | wt      |
| CAD24                 | 36.6              | (16–45)   | 63.8                  | (60–69)   | 1.1                                | (1–2)     | 1.0                 | (1–1)     | 68.3                 | (66–72)   | Mut (S)    | wt      |
| CAD25                 | 37.6              | (13–43)   | 69.4                  | (54–78)   | 1.3                                | (1–2)     | 2.4                 | (1–4)     | 69.7                 | (67–72)   | wt         | Mut (S) |
| CAD26                 | 38.0              | (26–57)   | 52.0                  | (29–61)   | 6.9                                | (4–12)    | 4.6                 | (3–8)     | 69.0                 | (67–70)   | wt         | wt      |
| CAD27                 | 39.2              | (32–48)   | 44.4                  | (29–57)   | 1.1                                | (1–2)     | 2.1                 | (0–4)     | 64.6                 | (62–66)   | wt         | wt      |
| CAD28                 | 45.7              | (18–69)   | 57.8                  | (27–77)   | 1.4                                | (1–3)     | 3.2                 | (2–7)     | 73.7                 | (72–77)   | wt         | wt      |
| CAD29                 | 48.0              | (26–60)   | 29.8                  | (21–36)   | 0.9                                | (0–2)     | 1.6                 | (0–3)     | 66.3                 | (63–68)   | wt         | wt      |
| CAD30                 | 48.2              | (38–55)   | 38.8                  | (21–49)   | 1.0                                | (1–1)     | 1.3                 | (1–2)     | 68.7                 | (65–71)   | wt         | wt      |
| CAD31                 | 54.5              | (30–68)   | 45.8                  | (22–65)   | 2.7                                | (1–7)     | 1.1                 | (0–2)     | 66.3                 | (62–69)   | wt         | wt      |
| CAD32                 | 55.7              | (44–63)   | 71.2                  | (64–78)   | 1.1                                | (1–2)     | 1.3                 | (0–4)     | 60.7                 | (58–63)   | wt         | wt      |
| CAD33                 | 60.6              | (34–89)   | 45.4                  | (27–63)   | 8.6                                | (2–35)    | 1.6                 | (1–2)     | 68.7                 | (65–71)   | wt         | wt      |
| CAD34                 | 64.1              | (39–78)   | 41.0                  | (25–50)   | 1.3                                | (1–2)     | 2.3                 | (1–4)     | 73.3                 | (70–75)   | wt         | Mut (S) |
| RAD1                  | 1.5               | (1–2)     | 71.4                  | (60–83)   | 2.3                                | (1–4)     | 2.9                 | (0–4)     | 75.3                 | (73–79)   | wt         | n.d.    |
| RAD2                  | 2.0               | (1–4)     | 64.0                  | (55–72)   | 14.9                               | (2–34)    | 3.4                 | (0–7)     | 71.3                 | (70–72)   | wt         | n.d.    |
| RAD3                  | 2.5               | (2–3)     | 66.4                  | (45–83)   | 5.9                                | (1–20)    | 2.7                 | (2–4)     | 67.3                 | (66–69)   | wt         | n.d.    |
| RAD4                  | 6.4               | (2–23)    | 80.0                  | (63–96)   | 1.9                                | (1–4)     | 1.8                 | (0–2)     | 66.3                 | (65–67)   | wt         | n.d.    |
| RAD5                  | 9.6               | (5–12)    | 48.2                  | (35–58)   | 7.1                                | (3–16)    | 3.2                 | (2–5)     | 67.3                 | (65–69)   | wt         | n.d.    |
| RAD6                  | 10.1              | (5–27)    | 46.0                  | (29–70)   | 7.1                                | (3–15)    | 4.8                 | (3–7)     | 74.0                 | (72–76)   | wt         | n.d.    |
| RAD7                  | 11.1              | (6–15)    | 42.2                  | (23–55)   | 1.1                                | (1–2)     | 3.4                 | (0–6)     | 68.3                 | (66–70)   | wt         | n.d.    |
| RAD8                  | 11.6              | (7–17)    | 40.2                  | (24–49)   | 2.1                                | (1–4)     | 2.1                 | (0–6)     | 69.3                 | (67–71)   | Mut (S)    | n.d.    |
| RAD9                  | 21.3              | (8–34)    | 53.2                  | (22–78)   | 1.3                                | (1–3)     | 3.4                 | (2–5)     | 67.7                 | (65–69)   | wt         | n.d.    |
| RAD10                 | 24.9              | (17–31)   | 26.4                  | (14–46)   | 5.9                                | (1–11)    | 1.5                 | (0–3)     | 73.0                 | (71–75)   | wt         | n.d.    |
| RAD11                 | 26.8              | (10–47)   | 41.6                  | (32–50)   | 1.1                                | (1–2)     | 3.1                 | (1–6)     | 71.7                 | (70–73)   | wt         | n.d.    |
| RAD12                 | 32.6              | (20–43)   | 69.8                  | (63–76)   | 2.3                                | (1–5)     | 1.4                 | (1–2)     | 67.7                 | (65–71)   | wt         | n.d.    |
| RAD13                 | 33.9              | (16–41)   | 58.2                  | (49–68)   | 1.6                                | (1–3)     | 2.0                 | (1–3)     | 70.0                 | (67–72)   | Mut (S)    | n.d.    |

Table 1. Cont.

| Case no.               | APC methylation † |           | RASSF1A methylation † |           | p16 <sup>INK4A</sup> methylation † |           | RAR-β methylation † |           | LINE-1 methylation † |           | Genotypes* |         |
|------------------------|-------------------|-----------|-----------------------|-----------|------------------------------------|-----------|---------------------|-----------|----------------------|-----------|------------|---------|
|                        | mean %            | (range) % | mean %                | (range) % | mean %                             | (range) % | mean %              | (range) % | mean %               | (range) % | MEN1       | HRPT2   |
| RAD14                  | 36.4              | (23–46)   | 53.6                  | (46–62)   | 2.0                                | (1–5)     | 2.0                 | (1–4)     | 68.0                 | (65–71)   | Mut (S)    | n.d.    |
| RAD15                  | 38.6              | (23–47)   | 56.4                  | (48–63)   | 0.9                                | (0–1)     | 0.9                 | (0–2)     | 67.7                 | (65–69)   | Mut (S)    | n.d.    |
| RAD16                  | 43.3              | (17–53)   | 53.4                  | (36–71)   | 1.0                                | (1–1)     | 1.9                 | (0–3)     | 69.0                 | (66–72)   | wt         | n.d.    |
| RAD17                  | 58.0              | (46–68)   | 64.4                  | (56–78)   | 1.3                                | (1–2)     | 4.8                 | (0–7)     | 68.7                 | (66–71)   | wt         | n.d.    |
| RAD18                  | 65.1              | (50–78)   | 72.4                  | (56–91)   | 0.7                                | (0–1)     | 1.5                 | (0–8)     | 67.0                 | (64–70)   | Mut (S)    | n.d.    |
| RAD19                  | 65.9              | (55–73)   | 63.0                  | (42–74)   | 1.9                                | (1–2)     | 2.8                 | (0–5)     | 63.7                 | (62–66)   | Mut (S)    | n.d.    |
| H1                     | 2.3               | (1–5)     | 16.2                  | (13–19)   | 1.4                                | (1–2)     | 4.1                 | (2–7)     | 78.3                 | (75–83)   | n.d.       | Mut (G) |
| H2                     | 77.5              | (30–89)   | 52.8                  | (32–62)   | 1.9                                | (1–3)     | 2.6                 | (1–4)     | 75.7                 | (73–78)   | n.d.       | Mut (G) |
| <i>SHPT</i>            |                   |           |                       |           |                                    |           |                     |           |                      |           |            |         |
| SHPT1                  | 2.5               | (2–3)     | 30.2                  | (16–54)   | 3.0                                | (1–5)     | 1.6                 | (0–4)     | 71.3                 | (69–76)   | n.d.       | n.d.    |
| <i>Normal controls</i> |                   |           |                       |           |                                    |           |                     |           |                      |           |            |         |
| Normal PT1             | 4.0               | (2–7)     | 5.2                   | (4–6)     | 2.9                                | (1–5)     | 2.1                 | (1–4)     | 60.7                 | (56–68)   | n.d.       | n.d.    |
| Normal PT2             | 2.2               | (1–5)     | 1.6                   | (1–2)     | 3.1                                | (1–7)     | 2.2                 | (1–4)     | 59.7                 | (55–67)   | n.d.       | n.d.    |
| Normal PT3             | 3.3               | (2–4)     | 3.0                   | (3–3)     | 2.1                                | (1–3)     | 2.6                 | (2–4)     | 72.3                 | (68–77)   | n.d.       | n.d.    |
| Leukocyte RAD2         | 2.3               | (1–4)     | 2.8                   | (2–3)     | 1.0                                | (1–1)     | 3.5                 | (2–6)     | 78.0                 | (75–80)   | n.d.       | n.d.    |
| Thymus H1              | 2.4               | (1–5)     | 3.8                   | (3–5)     | 1.6                                | (1–3)     | 6.8                 | (5–9)     | 77.3                 | (75–80)   | n.d.       | n.d.    |

† = Mean CpG methylation density in % (X% CpG1+Y% CpG2)/n, range within parenthesis.

n.d.: not determined; wt = wild-type, Mut (S/G) = somatic/germline mutation.

\* Genotypes according to previous publications [3,43–44].

doi:10.1371/journal.pone.0009472.t001

correlation (Pearson's correlation 0.322,  $p = 0.027$ ) was revealed between high *APC* methylation density and presence of an *MEN1* mutation (Figure 3). However, no association was observed between

*RASSF1A* methylation levels and *MEN1* genotype (Table 2). Furthermore, there was no correlation between *APC* or *RASSF1A* promoter methylation densities and *HRPT2* genotype (Table 2).

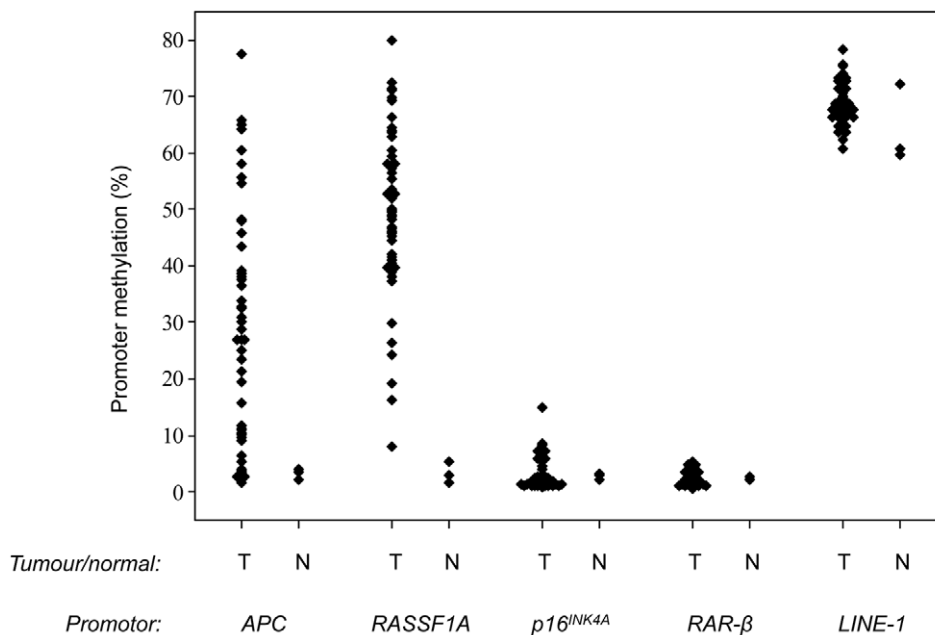

**Figure 2. Global and regional hypermethylation in parathyroid tumours.** Individual value plot illustrating the mean densities of CpG methylation of the *APC*, *RASSF1A*, *p16<sup>INK4A</sup>*, *RAR-β* and *LINE-1* promoters for the 55 parathyroid tumours (T) and 3 normal parathyroid controls (N). The Y axis represents the mean density of methylation calculated as an average of the individual CpG residues assayed.  
doi:10.1371/journal.pone.0009472.g002

**Table 2.** Correlations between hypermethylation levels and tumour characteristics.

| Parameter             | <i>RASSF1A</i>     | <i>APC</i>        |
|-----------------------|--------------------|-------------------|
| <i>RASSF1A</i>        | -                  | 0.301 (p = 0.022) |
| <i>APC</i>            | 0.301 (p = 0.022)  | -                 |
| Gender                | n.s.               | n.s.              |
| Age at diagnosis      | n.s.               | n.s.              |
| S-Ca                  | -0.417 (p = 0.003) | n.s.              |
| S-PTH                 | n.s.               | n.s.              |
| Tumour weight         | n.s.               | n.s.              |
| <i>MEN1</i> mutation  | n.s.               | 0.322 (p = 0.027) |
| <i>HRPT2</i> mutation | n.s.               | n.s.              |

n.s.: not significant.

doi:10.1371/journal.pone.0009472.t002

### APC and RASSF1A mRNA Expression Analyses by qRT-PCR

For *APC*, we assessed both total levels of *APC* mRNA and an *APC* 1B specific transcript regulated by the *APC* promoter 1B. No TaqMan Gene Expression Assay exists exclusively for the *APC* 1A transcript. For the total levels of *APC* mRNA, all 16 parathyroid adenomas available for qRT-PCR exhibited greater relative expression levels compared to the normal parathyroid mean, ranging from 1.3–9 (normal parathyroid mean = 1) and a mean relative expression of 4.5. For the *APC* 1B transcript, all tumours displayed greater relative expression levels compared to the normal parathyroid mean ranging from 2–20 (normal parathyroid mean = 1) and a mean relative expression of 8.7 (Figure 4). For *RASSF1A*, all 16 adenomas investigated have been shown to exhibit *RASSF1A* hypermethylation ranging from 37.2–71.2%. Using qRT-PCR, all tumours were found to exhibit lower relative *RASSF1A* mRNA expression levels compared to the normal parathyroid mean value, ranging from 0.05–0.8 (normal parathyroid mean = 1). The mean relative expression was 0.26, suggesting that parathyroid adenomas display a noteworthy reduction in *RASSF1A* expression compared to normal parathyroid (Figure 4).

### Discussion

In this study we demonstrate frequent hypermethylation of the *APC* and *RASSF1A* tumour suppressor genes in the majority of parathyroid adenomas. *RASSF1A* promoter hypermethylation led to diminished *RASSF1A* mRNA levels in parathyroid adenomas as compared to normal parathyroid tissues, whereas *APC* gene expression is retained through augmented expression of *APC* 1B mRNA regulated by *APC* promoter 1B. In addition, based on *LINE-1* promoter methylation results parathyroid benign tumours were found to exhibit global methylation levels within range of the normal parathyroid tissues examined.

*APC* gene expression is regulated by at least two separate promoter regions, named 1A and 1B. Hypermethylation of promoter 1A has been readily demonstrated in various human tumours; however to our knowledge there is no or little evidence suggesting epigenetic inactivation of the *APC* promoter 1B through hypermethylation [33]. Hence, for this purpose we focused solely on the *APC* promoter 1A regarding Pyrosequencing analyses. In our tumour panel, hypermethylation of the *APC* promoter 1A was found in the majority of benign parathyroid tumours, as well as in one familial *HRPT2* related case. These results are supported by

**Table 3.** Summary of the parathyroid tumour study group.

| Parameter                  |                   |
|----------------------------|-------------------|
| Number of samples/patients | 55                |
| Sex                        |                   |
| female                     | 33                |
| male                       | 22                |
| Age at diagnosis           |                   |
| median (range) years       | 62 (16–86)        |
| Familial disease           |                   |
| sporadic                   | 52                |
| HPT-JT                     | 2                 |
| FIHP                       | 1                 |
| Histopathology             |                   |
| adenoma                    | 53                |
| atypical adenoma           | 2                 |
| S-Ca                       |                   |
| median (range) mmol/L      | 2.85 (2.60–4.00)  |
| S-PTH                      |                   |
| median (range) ng/L        | 121 (36–711)      |
| Tumor size                 |                   |
| median (range) gram        | 1.24 (0.20–11.18) |
| <i>MEN1</i> sequence       |                   |
| mutated                    | 7                 |
| wild-type                  | 46                |
| n.a.                       | 2                 |
| <i>HRPT2</i> sequence      |                   |
| mutated                    | 5                 |
| wild-type                  | 31                |
| n.a.                       | 19                |

n.a.: not available.

doi:10.1371/journal.pone.0009472.t003

research in colorectal tumorigenesis, where promoter 1A methylation is regarded as an early event and is readily detected in small colorectal adenomas [33]. Furthermore, in this study all 16 adenomas analyzed by qRT-PCR displayed augmented *APC* 1B mRNA levels as compared to normal parathyroid tissues, strongly suggesting that the *APC* promoter 1B is not epigenetically silenced in these tumours.

Parafibromin, encoded by *HRPT2*, is a vital part of the hPAF complex involved in epigenetic modifications for facilitating gene transcription, and has also been shown to specifically regulate *c-Myc* oncogene expression through binding directly to the *c-Myc* promoter region [7]. Our results do not point towards a specific correlation between *APC* promoter methylation and *HRPT2* gene mutations, suggesting that parafibromin may not play an apparent role in the regulation of *APC* promoter 1A methylation. However, *APC* promoter 1A methylation displayed a weak but significant correlation to the tumour suppressor *MEN1* genotype, and all parathyroid tumours with *MEN1* mutations in our panel displayed *APC* hypermethylation ranging from 11.6–65.9% (Figure 2). Interestingly, the *MEN1* protein product menin has recently been implicated as an epigenetic modifier of Axin2, a component within the *Wnt* pathway as well as an APC-associated protein [8]. Our study vaguely implies that menin might regulate the levels of *APC* promoter methylation at the DNA level in parathyroid cells, since

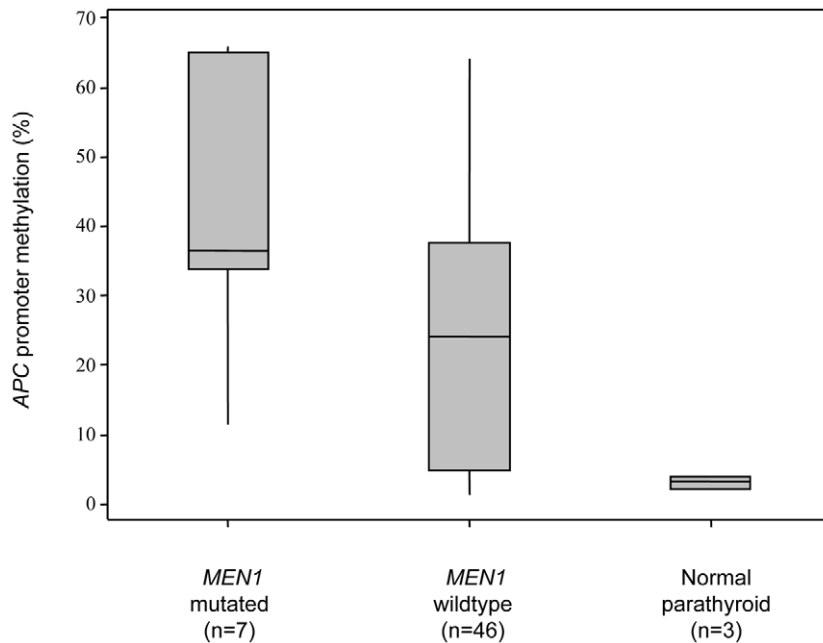

**Figure 3. APC promoter 1A hypermethylation in parathyroid tumours with a coupling to *MEN1* mutations.** Boxplot displaying *APC* promoter methylation in comparison to *MEN1* genotype for all cases where genotype data was available. The endpoints of the boxes represent the first and third quartiles respectively, and the horizontal line corresponds to the median. High *APC* promoter methylation density is statistically correlated to *MEN1* mutational status. doi:10.1371/journal.pone.0009472.g003

cases with *MEN1* mutations in general displayed higher levels of methylation than wild-type cases. Further molecular studies are needed to investigate the potential role of menin as a DNA regulator of *APC* promoter methylation status in addition to its known role as an Axin2 regulator through histone methylation.

The *RASSF1A* promoter was found to be hypermethylated in nearly all parathyroid adenomas examined and *RASSF1A* gene expression levels were considerably reduced in adenomas compared to normal parathyroid tissue. These data strongly support the involvement of this tumour suppressor gene in parathyroid tumorigenesis. In unrelated tumour tissues, *RASSF1A* promoter methylation has been shown to greatly diminish the levels of *RASSF1A* mRNA transcription, and subsequent usage of demethylating agents such as 5-Aza-CdR reconstitutes the *RASSF1A* transcription levels [34]. The role of *RASSF1A* as a cyclin D1 posttranslational modifier motivated us to correlate our methylation data to previous cyclin D1 expression results for the parathyroid cystic adenomas published elsewhere [35]. However, no statistical correlation between increased *RASSF1A* promoter methylation density and over-expressed cyclin D1 levels were seen (data not shown), suggesting that *RASSF1A* hypermethylation at least in part might contribute to excessive parathyroid tumour growth by other means than cyclin D1 accumulation, for example through its role as a regulator of apoptosis and mitotic arrest [19].

Regarding *APC*, we demonstrate three cases of normal parathyroid tissue (Normal PT1-3) as well as a case of secondary hyperparathyroidism with hyperplasia (case SHPT1) displaying virtually no CpG promoter methylation, suggesting that methylation of this locus might be conserved to true tumorous lesions of the parathyroids, such as adenomas and carcinomas. Moreover, studies have shown that normal adrenal as well as normal colonic mucosa in general shows *APC* promoter 1A methylation levels below 5%, as compared to the higher levels observed in the corresponding tumours [20,32]. Also, the vast majority of cases of

normal breast and lung tissue display an un-methylated *APC* promoter 1A as compared to the corresponding tumours [15,36]; consequently these are examples which illustrate the tumour-specific phenotype for *APC* promoter 1A methylation in some tissue types.

For *RASSF1A*, the three normal parathyroid samples were endowed with virtually no methylation (2.0%, 3.6% and 3.0% respectively) whereas case SHPT1 was endowed with a methylation density of approximately 30%, suggesting that *RASSF1A* methylation also can be found in parathyroid tissue with an disproportionate growth pattern, albeit not a tumour per definition. Interestingly, cyclin D1 over-expression is also found in a fraction of cases with secondary hyperparathyroidism, suggesting that a subset of these lesions are propelled in parts by processes similar to those present in parathyroid adenomas and carcinomas [37]. Hence, the finding of *RASSF1A* hypermethylation in case SHPT1 could imply that this process could contribute to pathological growth in secondary hyperparathyroidism in addition to adenomas. In other non-neoplastic endocrine tissues such as the normal adrenal medulla and normal thyroid tissue, the *RASSF1A* promoter habitually exhibit low levels (<10%) of methylation densities with few exceptions [20–21]. In our study, normal thymus and leukocyte DNA was used as additional controls and displayed low levels of *RASSF1A* methylation, validating the specificity of our findings. Furthermore, a tumour case in our study displayed virtually no *RASSF1A* promoter methylation (CAD13, 8%), suggesting that parathyroid tissue not routinely exhibit high levels of methylation at this locus.

It is not known whether the hypermethylation of *APC* promoter 1A bears any pathological consequences to parathyroid growth, since *APC* protein expression has been previously demonstrated in parathyroid adenomas [16,27]. However, a recent study has shown reduced *APC* promoter 1A mRNA levels in colorectal tumours with *APC* promoter 1A hypermethylation although



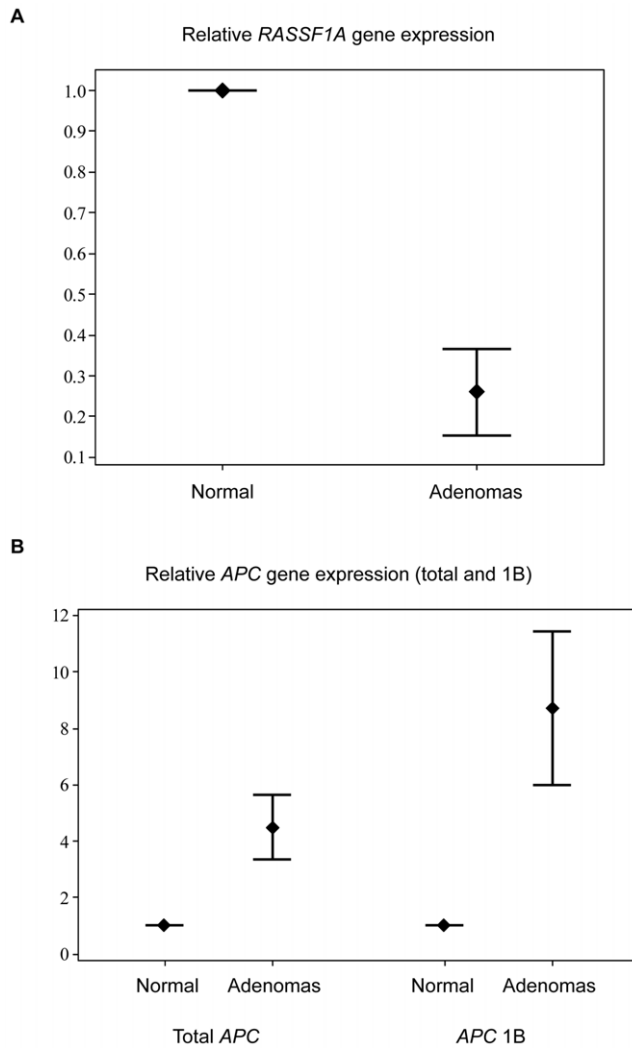

**Figure 4. Interval plots demonstrating relative *RASSF1A* and *APC* gene expression in parathyroid tumours.** 16 adenomas were compared to the normal parathyroid mean regarding (A) *RASSF1A* and (B) total *APC* and *APC* 1B gene expression. The endpoints of the intervals represent the 95% confidence interval for the mean, and the diamond corresponds to the mean value.  
doi:10.1371/journal.pone.0009472.g004

retained *APC* protein expression through promoter 1B activity, and the authors advocate that even a slight decrease of *APC* gene transcription through the epigenetic silencing of promoter 1A could have an impact on Wnt signalling, although via unknown mechanisms [33]. Furthermore, another study regarding colorectal cancer found no correlations between *APC* methylation levels and *APC* protein expression [38]. In this study, we found notably augmented levels of total *APC* mRNA levels (from promoters 1A and 1B) as well as *APC* 1B mRNA in the adenomas investigated by qRT-PCR, of which 13 out of 16 samples displayed *APC* promoter 1A hypermethylation (Figure 4). These data imply that *APC* 1B mRNA is highly expressed in parathyroid adenomas, suggesting that the *APC* promoter 1B is not epigenetically inactivated in these cases. This presents a credible explanation to the fact that parathyroid adenomas display retained *APC* protein expression as demonstrated in previous publications although possibly endowed with *APC* promoter 1A hypermethylation [16,27]. Furthermore, the finding of elevated levels of total *APC* mRNA is most likely a

result of elevated levels of *APC* 1B mRNA expression, and does not argue directly against the theoretical, specific down-regulation of the *APC* 1A mRNA, the latter which is an observed phenomenon in colon cancer research [33]. In studies of unrelated tumour tissues, *APC* promoter 1A methylation is coupled to down-regulation of *APC* 1A mRNA, and treatment with demethylating agents results in re-expression of the specific transcript, demonstrating the sensible correlation between *APC* promoter methylation and *APC* mRNA transcript levels *in vivo* [39].

*LINE-1* bisulphite Pyrosequencing analysis has been shown to be an efficient substitute for global methylation assays [31], and our data thus suggests that parathyroid tumours display comparable methylation levels globally as normal parathyroid cells. This finding was unexpected, considering the current notion that human cancers generally exhibit global hypomethylation. In support of our findings, a current study recently demonstrated global hypermethylation in patients with myelodysplastic syndrome (MDS) as compared to normal controls using *LINE-1* Pyrosequencing [40]. The authors furthermore observed noteworthy clinical improvement among MDS patients when treated with hypomethylation-inducing agents, suggesting that the global hypermethylation was of clinical significance in this tumour type. Hence, these data suggest that not all tumours display relative hypomethylation globally compared to their corresponding normal tissues. In addition, we found that male cases displayed significantly higher levels of *LINE-1* methylation than female cases (Pearson's correlation  $-0.466$ ,  $p < 0.001$ ), and cases with higher age at surgery displayed lower levels of *LINE-1* methylation than younger cases (Pearson's correlation  $0.320$ ,  $p = 0.018$ ). These observations may suggest an influence of age or gender upon global levels of methylation in parathyroid tissues.

In summary, this study is the first to identify *APC* and *RASSF1A* promoter hypermethylation in the majority of parathyroid tumours investigated. The frequently observed hypermethylation of the *RASSF1A* promoter and downregulation of *RASSF1A* mRNA levels in parathyroid adenomas point toward an association between the inactivation of this tumour suppressor gene and parathyroid aberrant growth, whereas *APC* gene expression is retained in parathyroid adenomas due to increased transcription from *APC* promoter 1B. Moreover, *LINE-1* analyses indicate that parathyroid tumours do not exhibit global hypomethylation as compared to normal parathyroid tissues.

## Materials and Methods

### Ethics Statement

Fifty-five samples of parathyroid adenoma were collected with informed verbal consent. Informed verbal consent constitutes standard procedure at the Karolinska University Hospital, and the consent is subsequently documented in the patient's medical journal as according to Swedish Biobank law. The procedure has been specifically approved by the Karolinska University Hospital Ethics Committee and by the Karolinska Institute Research Ethics Committee, and these approvals include collection of normal parathyroid biopsies as well as normal tissues (including blood and thymus tissue) whenever motivated from patients undergoing surgery for primary and secondary hyperparathyroidism.

### Patients and Tissue Samples

Fifty-five samples of parathyroid adenoma were collected for the study (Tables 1 and 3, Table S1). Histopathological classifications were according to the guidelines of the World Health Organization (WHO) [41]. Thirty-four cases were parathyroid adenomas with cystic features (CAD1-34), which have previously been reported in



detail including screening for *HRPT2* and *MEN1* mutations [3,35]. Thirty-three of these cases were sporadic and one single case (CAD11) was derived from a 1q linked FIHP family. In addition one case (CAD25) was classified as an atypical adenoma. Two additional *HRPT2* related adenomas were derived from patients with germline *HRPT2* mutations (H1-2). Tumor H1 exhibited atypical histological findings that are sometimes seen in malignant parathyroid tumours, but was without definite criteria of malignancy in agreement with the diagnosis atypical adenoma or equivocal carcinomas as previously applied [42]. Nineteen cases were regular parathyroid adenomas (RAD1-19) that have been previously characterized for *MEN1* genotype [43–44]. Moreover, a case of parathyroid hyperplasia due to secondary hyperparathyroidism (SHPT1) was also included in the study. As non-tumorous normal controls, three samples of normal parathyroid tissue derived from surgical biopsies were included together with human leukocyte DNA from patient RAD2 as well as thymic tissue from patient H1.

### Bisulphite Treatment of DNA and Pyrosequencing Analyses

Sodium bisulphite modification of 500 ng DNA was carried out with the EZ DNA methylation kit (D5002, Zymo Research Corporation, CA, USA) following the manufacturer's protocol. The subsequent PCR and Pyrosequencing analysis to assess the level of methylation was carried out essentially as previously described for 10 CpG sites of the *APC* promoter 1A [20], 7 CpG sites of the *p16<sup>INK4A</sup>* promoter [45], 5 CpG sites of the *RASSF1A* promoter [46], 10 CpG sites of the *RAR-β* promoter [20] and 3 CpG sites of the *LINE-1* promoter [20]. Primer sequences are available at the PyroMark Assay Database (Biotage, Sweden) for all assays with the exception of *p16<sup>INK4A</sup>*, and were designed to hybridize with CpG-free regions to secure methylation-independent amplification. HotStar Taq polymerase was used to amplify 1 μl of bisulphite-treated DNA. PCR conditions were 95°C 15 min followed by 45 cycles of: 95°C 20 s, 50°C (*RAR-β* and *LINE-1*) or 55°C (*APC*, *RASSF1A*, *p16<sup>INK4A</sup>*) 20 s, 72°C 20 s, followed by 72°C 5 min and finally 4°C. All samples and blank controls for each reaction (PCR water control and additional non-PCR water control) were then analyzed using Pyrosequencing analysis and the PyroMark Q24 system (Biotage). Subsequent quantification of methylation density was done using the PyroMark Q24 software. Cases of bisulphite-treated normal leukocyte and thymic DNA were assessed as additional negative controls. Subsets of cases were re-analyzed with repeated PCR and Pyrosequencing reactions to test the validity of the initial Pyrosequencing findings for all promoter regions included, with similar end results (data not shown). Subsets of cases (including both tumour and normal parathyroid samples) were also repeatedly bisulphite treated and subsequently analyzed using PCR and Pyrosequencing, with analogous results (data not shown).

We chose to define hypermethylation as an average CpG residue methylation above 10% for *APC*, *RASSF1A*, *p16<sup>INK4A</sup>* and *RAR-beta* since the normal parathyroid mean as well as other normal tissues in this study were below this value.

### RNA Isolation, cDNA Synthesis and Quantitative RT-PCR (qRT-PCR)

Total RNA was available for 16 of the parathyroid adenomas and two of the normal parathyroid glands (normal PT1-2). All samples were extracted using the TRIzol Reagent (Invitrogen, CA, USA) and subsequently purified with the RNeasy kit (Qiagen, CA, USA). The RNA quality was verified using the NanoDrop ND-1000 (Thermo Scientific, DE, USA) for confirmation of acceptable 260/

280 nm absorbance ratio as well as determining the sample concentrations. In addition, all RNA samples were analyzed in agarose gels where the integrity of the 28S and 18S bands was verified. Subsequent cDNA synthesis was performed using the High Capacity cDNA Reverse Transcription Kit (Applied Biosystems, CA, USA) following the company protocol. Subsequent assessment of *APC* and *RASSF1A* mRNA levels was carried out by quantitative RT-PCR (qRT-PCR) using the TaqMan Gene Expression Assay Technique and the 7900HT Fast Real-Time PCR System (Applied Biosystems, CA, USA). For *APC*, two assays were included; Hs00181051\_m1 which covers total levels of *APC* mRNA (covering three transcript variants, one regulated from promoter 1A and two from 1B) and Hs01568282\_m1 which covers the specific *APC* 1B transcript regulated by promoter 1B. There is no assay available exclusively for the analysis of the *APC* 1A transcript regulated by the *APC* promoter 1A using the TaqMan Gene Expression Assay technique. The *RPLP0* (ribosomal protein, large, P0), also known as *36B4*, has been used in previous publications by the authors and was selected as a housekeeping reference known to demonstrate little variation in parathyroid tissues (Hs99999902\_m1) [35]. For the *APC* promoter 1A, 13/16 adenomas available for qRT-PCR displayed hypermethylation ranging from 10.3–64.1%. For *RASSF1A*, all 16 adenomas analyzed demonstrated *RASSF1A* promoter hypermethylation ranging from 37.2–71.2%. The two normal parathyroid tissues analyzed were devoid of hypermethylation covering both the *RASSF1A* and *APC* promoters.

A standard curve was established for relative quantification using cDNA from tumour case CAD20, and the qRT-PCR was carried out in 25 μl reactions with 12.5 μl TaqMan Gene Expression Master Mix, 8.5 μl RNase free H<sub>2</sub>O, 1 μl TaqMan Gene Expression Assay and 3 μl cDNA. The thermocycling conditions were 50°C for 2 min, 95°C for 10 min followed by 40 cycles of 95°C for 15 sec and 60°C for 1 min. Two non-template controls were assessed as negative controls for each experiment, and all experiments were carried out in double. After quantification relative to the standard curve, all samples were normalized to their corresponding *RPLP0* value and thereafter the normal parathyroid mean for each assay.

### Statistical Analyses

Possible correlations between methylation density in the different promoters assayed as well as between individual promoters and clinical/genetic characteristics were evaluated using the Minitab 15 statistical software (Minitab Inc, PA, USA). Correlations were appraised by Pearson's correlation and differences between groups were verified using Fisher's exact test. P-values <0.05 were considered as statistically significant.

### Supporting Information

#### Table S1

Found at: doi:10.1371/journal.pone.0009472.s001 (0.03 MB XLS)

### Acknowledgments

The authors are indebted to Dr. Klas Strååt for exceptional technical assistance, Dr. Robert Bränström for valuable contributions to the study design and to Ms. Elisabeth Ånfalk for excellent tissue handling.

### Author Contributions

Conceived and designed the experiments: CJ NBK AV AH CL. Performed the experiments: CJ NBK FH. Analyzed the data: CJ NBK AV CL. Contributed reagents/materials/analysis tools: JN AH. Wrote the paper: CJ CL.

## References

- Chandrasekharappa SC, Guru SC, Manickam P, Olufemi SE, Collins FS, et al. (1997) Positional cloning of the gene for multiple endocrine neoplasia-type 1. *Science* 276: 404–407.
- Lemmens I, Merregaert J, Van de Ven WJ, Kas K, Zhang CX, et al. (1997) Construction of a 1.2-Mb sequence-ready contig of chromosome 11q13 encompassing the multiple endocrine neoplasia type 1 (MEN1) gene. The European Consortium on MEN1. *Genomics* 44: 94–100.
- Carpenter JD, Robbins CM, Villablanca A, Forsberg L, Prescittini S, et al. (2002) HRPT2, encoding parafibromin, is mutated in hyperparathyroidism-jaw tumor syndrome. *Nat Genet* 32: 676–680.
- Mosimann C, Hausmann G, Basler K (2006) Parafibromin/Hyrax activates Wnt/Wg target gene transcription by direct association with  $\beta$ -catenin/Armadillo. *Cell* 125: 327–341.
- Rozenblatt-Rosen O, Hughes CM, Nannepaga SJ, Shanmugam KS, Copeland TD, et al. (2005) The parafibromin tumor suppressor protein is part of a human Paf1 complex. *Mol Cell Biol* 25: 612–620.
- Yart A, Gstaiger M, Wirbelauer C, Pecnik M, Anastasiou D, et al. (2005) The HRPT2 tumor suppressor gene product parafibromin associates with human PAF1 and RNA polymerase II. *Mol Cell Biol* 25: 5052–5060.
- Lin L, Zhang J-H, Panicker LM, Simonds WF (2008) The parafibromin tumor suppressor protein inhibits cell proliferation by repression of the c-myc proto-oncogene. *Proc Natl Acad Sci U S A* 105: 17420–17425.
- Chen G, A J, Wang M, Farley S, Lee LY, et al. (2008) Menin promotes the Wnt signaling pathway in pancreatic endocrine cells. *Mol Cancer Res* 6: 1894–1907.
- Mould AW, Duncan R, Serewko-Auret M, Loffler KA, Biondi C, et al. (2009) Global expression profiling of sex cord stromal tumors from Men1 heterozygous mice identifies altered TGF- $\beta$  signaling, decreased Gata6 and increased Csf1r expression. *Int J Cancer* 124: 1122–1132.
- Groden J, Thliveris A, Samowitz W, Carlson M, Gelbert L, et al. (1991) Identification and characterization of the familial adenomatous polyposis coli gene. *Cell* 66: 589–600.
- Miyoshi Y, Ando H, Nagase H, Nishisho I, Horii A, et al. (1992) Germ-line mutations of the APC gene in 53 familial adenomatous polyposis patients. *Proc Natl Acad Sci U S A* 89: 4452–4456.
- Zeki K, Spambalg D, Sharifi N, Gonsky R, Fagin JA (1994) Mutations of the adenomatous polyposis coli gene in sporadic thyroid neoplasms. *J Clin Endocrinol Metab* 79: 1317–1321.
- Hayes MJ, Thomas D, Emmons A, Giordano TJ, Kleer CG (2008) Genetic changes of Wnt pathway genes are common events in metaplastic carcinomas of the breast. *Clin Ca Res* 14: 4038–4044.
- Esteller M, Sparks A, Toyota M, Sanchez-Cespedes M, Capella G, et al. (2000) Analysis of adenomatous polyposis coli promoter hypermethylation in human cancer. *Cancer Res* 60: 4366–4371.
- Virmani AK, Rathi A, Sathyanarayana UG, Padar A, Huang CX, et al. (2001) Aberrant methylation of the adenomatous polyposis coli (APC) gene promoter 1A in breast and lung carcinomas. *Clin Ca Res* 7: 1998–2004.
- Juhlin CC, Haglund F, Villablanca A, Forsberg L, Sandelin K, et al. (2009) Loss of expression for the Wnt pathway components adenomatous polyposis coli (APC) and glycogen synthase kinase 3- $\beta$  (GSK3- $\beta$ ) in parathyroid carcinomas. *Int J Oncol* 34: 481–492.
- Hsi ED, Zukerberg LR, Yang WI, Arnold A (1996) Cyclin D1/PRAD1 expression in parathyroid adenomas: an immunohistochemical study. *J Clin Endocrinol Metab* 81: 1736–1739.
- Tahara H, Smith AP, Gaz RD, Arnold A (1996) Loss of chromosome arm 9p DNA and analysis of the p16 and p15 cyclin-dependent kinase inhibitor genes in human parathyroid adenomas. *J Clin Endocrinol Metab* 81: 3663–3667.
- Donninger H, Vos MD, Clark GJ (2007) The RASSF1A tumor suppressor. *J Cell Sci* 120: 3163–3172.
- Geli J, Kiss N, Karimi M, Lee JJ, Bäckdahl M, et al. (2008) Global and regional CpG methylation in pheochromocytomas and abdominal paragangliomas: association to malignant behavior. *Clin Ca Res* 14: 2551–2559.
- Lee JJ, Geli J, Larsson C, Wallin G, Karimi M, et al. (2008) Gene-specific promoter hypermethylation without global hypomethylation in follicular thyroid cancer. *Int J Oncol* 33: 861–869.
- Shivakumar L, Mimma J, Sakamaki T, Pestell R, White MA (2002) The RASSF1A tumor suppressor blocks cell cycle progression and inhibits cyclin D1 accumulation. *Mol Cell Biol* 22: 4309–4318.
- Fackler MJ, McVeigh M, Evron E, Garrett E, Mehrotra J, et al. (2003) DNA methylation of RASSF1A, HIN-1, RAR- $\beta$ , Cyclin D2 and Twist in situ and invasive lobular breast carcinoma. *Int J Cancer* 107: 970–975.
- Jerónimo C, Henrique R, Hoque MO, Ribeiro FR, Oliveira J, et al. (2004) Quantitative RAR $\beta$ 2 hypermethylation: a promising prostate cancer marker. *Clin Ca Res* 10: 4010–4014.
- Fischer JR, Ohnmacht U, Rieger N, Zemaitis M, Stoffregen C, et al. (2006) Promoter methylation of RASSF1A, RAR $\beta$  and DAPK predict poor prognosis of patients with malignant mesothelioma. *Lung Cancer* 54: 109–116.
- He M, Vanaja DK, Karnes RJ, Young CY (2009) Epigenetic regulation of Myc on retinoic acid receptor beta and PDLIM4 in RWPE1 cells. *Prostate* 69: 1643–1650.
- Björklund P, Akerström G, Westin G (2007) Accumulation of nonphosphorylated beta-catenin and c-myc in primary and uremic secondary hyperparathyroid tumors. *J Clin Endocrinol Metab* 92: 338–344.
- Feinberg AP, Vogelstein B (1983) Hypomethylation distinguishes genes of some human cancers from their normal counterparts. *Nature* 301: 89–92.
- Ogino S, Noshiro K, Kirkner GJ, Kawasaki T, Chan AT, et al. (2008) A cohort study of tumoral LINE-1 hypomethylation and prognosis in colon cancer. *J Natl Cancer Inst* 100: 1734–1738.
- Miki Y, Nishisho I, Horii A, Miyoshi Y, Utsunomiya J, et al. (1992) Disruption of the APC gene by a retrotransposal insertion of L1 sequence in a colon cancer. *Cancer Res* 52: 643–645.
- Yang AS, Estéicio MR, Doshi K, Kondo Y, Tajara EH, et al. (2004) A simple method for estimating global DNA methylation using bisulfite PCR of repetitive DNA elements. *Nucleic Acids Res* 32: e38.
- Belshaw NJ, Elliott GO, Foxall RJ, Dainty JR, Pal N, et al. (2008) Profiling CpG island field methylation in both morphologically normal and neoplastic human colonic mucosa. *Br J Cancer* 99: 136–142.
- Segditsas S, Sieber OM, Rowan A, Setien F, Neale K, et al. (2008) Promoter hypermethylation leads to decreased APC mRNA expression in familial polyposis and sporadic colorectal tumours, but does not substitute for truncating mutations. *Exp Mol Pathol* 85: 201–206.
- Shen WJ, Dai DQ, Teng Y, Liu HB (2008) Regulation of demethylation and re-expression of RASSF1A gene in gastric cancer cell lines by combined treatment of 5-Aza-CdR and NaB. *World J Gastroenterol* 14: 595–600.
- Juhlin C, Höög A, Yakoleva T, Leibiger I, Leibiger B, et al. (2006) Loss of parafibromin expression in a subset of sporadic parathyroid adenomas. *Endocr Relat Cancer* 13: 509–523.
- Van der Auwera I, Van Laere SJ, Van den Bosch SM, Van den Eynden GG, Trinh BX, et al. (2008) Aberrant methylation of the Adenomatous Polyposis Coli (APC) gene promoter is associated with the inflammatory breast cancer phenotype. *Br J Cancer* 99: 1735–1742.
- Tominaga Y, Tsuzuki T, Uchida K, Haba T, Otsuka S, et al. (1999) Expression of PRAD1/cyclin D1, retinoblastoma gene products, and Ki67 in parathyroid hyperplasia caused by chronic renal failure versus primary adenoma. *Kidney Int* 55: 1375–1383.
- Chen J, Röcken C, Lofton-Day C, Schulz HU, Müller O, et al. (2005) Molecular analysis of APC promoter methylation and protein expression in colorectal cancer metastasis. *Carcinogenesis* 26: 37–43.
- Zysman M, Saka A, Millar A, Knight J, Chapman W, Bapat B (2002) Methylation of adenomatous polyposis coli in endometrial cancer occurs more frequently in tumors with microsatellite instability phenotype. *Cancer Res* 62: 3663–3666.
- Römermann D, Hasemeier B, Metzger K, Göhring G, Schlegelberger B, et al. (2008) Global increase in DNA methylation in patients with myelodysplastic syndrome. *Leukemia* 22: 1954–1956.
- DeLellis RA, Lloyd RV, Heitz PU, Eng C (2004) Tumours of endocrine organs. In: DeLellis RA, Lloyd RV, Heitz PU, Eng C, eds. *World Health Organization classification of tumour pathology and genetics*. Eds. Lyon: IARC Press. pp 124–132.
- Juhlin CC, Villablanca A, Sandelin K, Haglund F, Nordenström J, et al. (2007) Parafibromin immunoreactivity – its use as an additional diagnostic marker for parathyroid tumor classification. *Endocr Relat Cancer* 14: 501–512.
- Farnebo F, Teh BT, Kytölä S, Svensson A, Phelan C, et al. (1998) Alterations of the MEN1 gene in sporadic parathyroid tumors. *J Clin Endocrinol Metab* 83: 2627–2630.
- Farnebo F, Kytölä S, Teh BT, Dwight T, Wong FK, et al. (1999) Alternative genetic pathways in parathyroid tumorigenesis. *J Clin Endocrinol Metab* 84: 3775–3780.
- Kiss NB, Geli J, Lundberg F, Avci C, Velazquez-Fernandez D, et al. (2008) Methylation of the p16INK4A promoter is associated with malignant behavior in abdominal extra-adrenal paragangliomas but not pheochromocytomas. *Endocr Relat Cancer* 15: 609–621.
- Geli J, Kiss N, Lanner F, Foukakis T, Natalishvili N, et al. (2007) The Ras effectors NORE1A and RASSF1A are frequently inactivated in pheochromocytoma and abdominal paraganglioma. *Endocr Relat Cancer* 14: 125–134.
